# Supplementary material for: In Vivo Confocal Microscopy of Trachoma in Relation to Normal Tarsal Conjunctiva
Source: PubMed Central journal article supplement (PMC3267042; doi:10.1016/j.ophtha.2010.08.029), 2011-04
Supplement: mmc2.pdf [file mmc2.pdf]

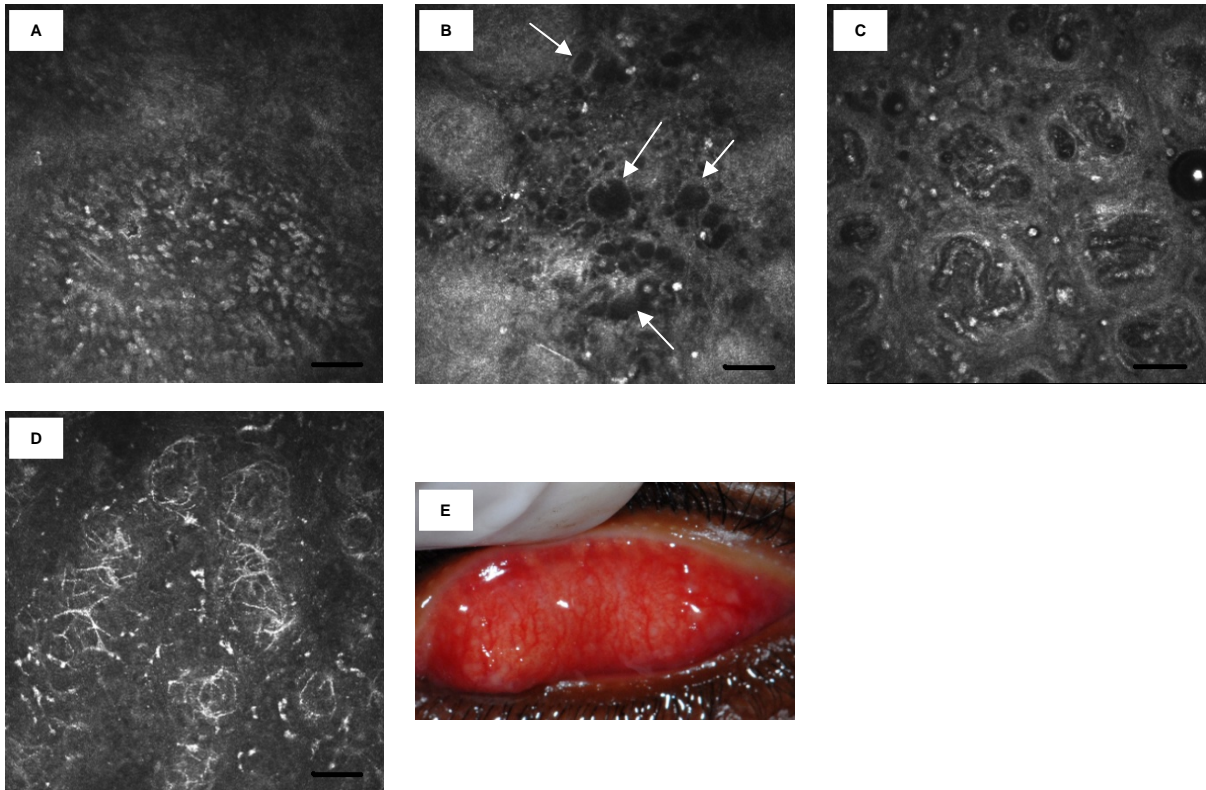

**Figure 3.** Active disease in children. Images are  $400\times 400\mu\text{m}$  with the bar representing  $50\mu\text{m}$ . **A**, Follicle at a depth of  $20\mu\text{m}$ . **B**, Cystic lacunae (arrows). The tissue at the edges of this image has some resemblance to early lymphocyte cell aggregates, but no cellularity is seen on further sections at different depths. **C**, Honeycomb with central blood vessels. **D**, Numerous, inter-digitating dendritiform cells. **E**, Clinical photograph of the subject shown in A, note numerous follicles.
