# Supplementary material for: In Vivo Confocal Microscopy of Trachoma in Relation to Normal Tarsal Conjunctiva
Source: PubMed Central journal article supplement (PMC3267042; doi:10.1016/j.ophtha.2010.08.029), 2011-04
Supplement: mmc3.pdf [file mmc3.pdf]

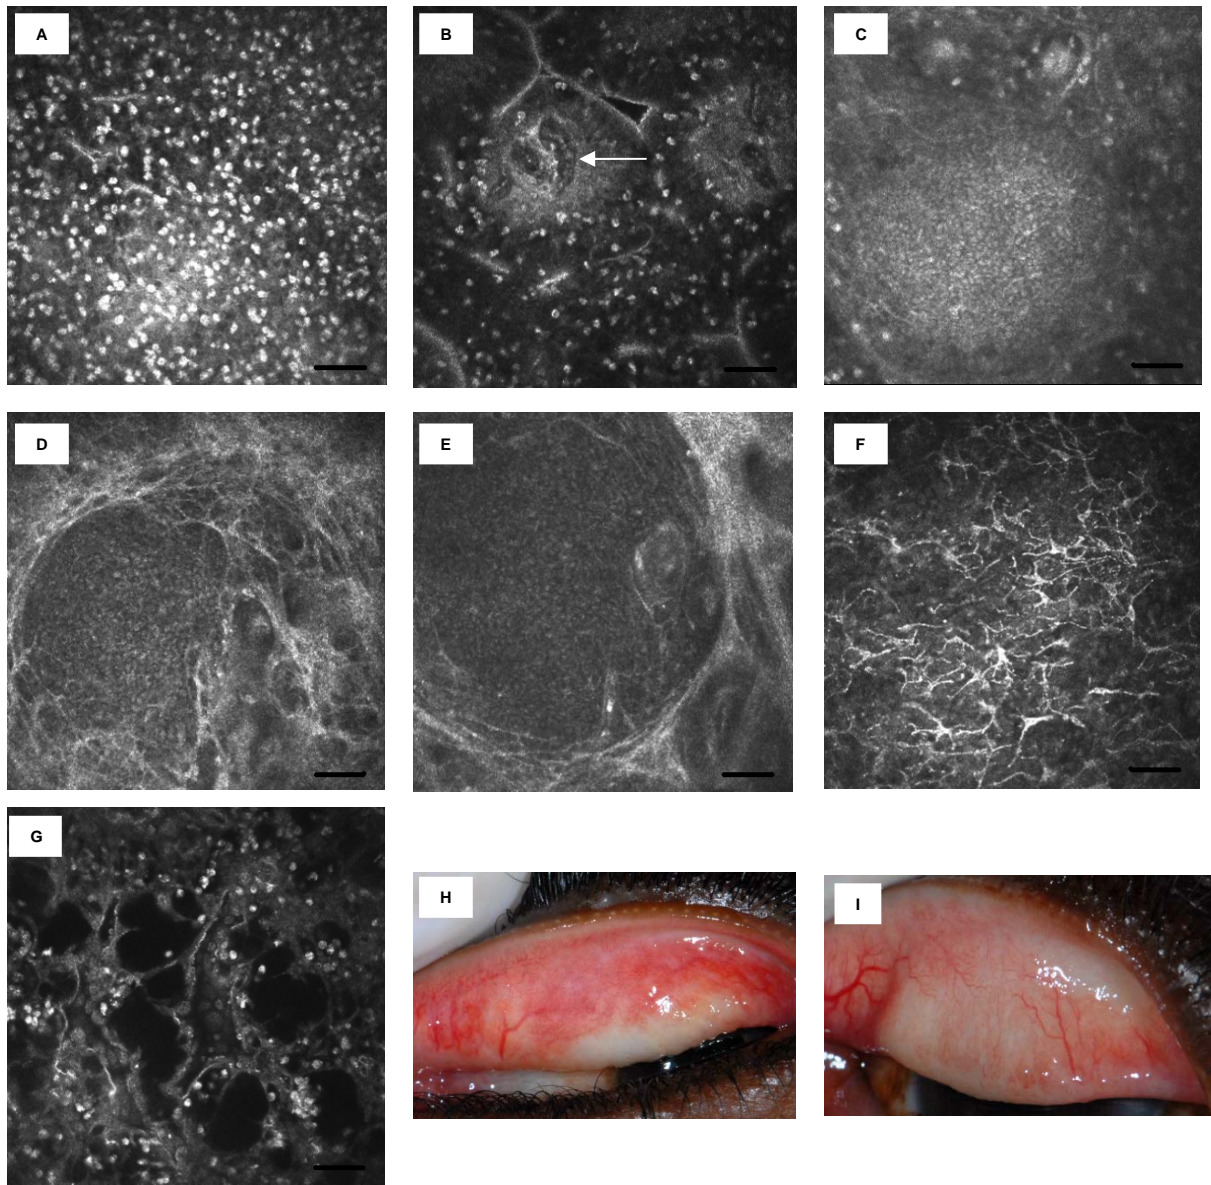

**Figure 5.** Active disease in adults with conjunctival scarring. Images are 400×400µm with the bar representing 50µm. **A**, Increased inflammatory cell infiltrate. **B**, Papillae with central vessels (arrow). **C-E**, Follicles at various depths. **F**, activated dendritiform cells. **G**, Cystic lacunae. **H**, Clinical photograph of the subject shown in A, note bands of scarring and papillary inflammation with obscuration of deep vessels. **I**, clinical photograph of the subject shown in C, note bands of scarring but lack of prominent follicles.
